# Supplementary material for: Orthodontic treatment demand for fixed treatment and aligners among young adults in middle Europe and South America – a questionnaire study
Source: Springer Nature journal article supplement (doi:10.1186/s12903-024-04023-0), 2024-03-02
Supplement: MOESM1 [file 26810936]

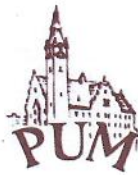

Pomorski Uniwersytet Medyczny w Szczecinie

KOMISJA BIOETYCZNA

Szczecin, 05 września 2022 r.

KB.006.83.2022/Z-6546

**Pan**  
**Maciej Jedliński**  
Zakład Stomatologii Zintegrowanej PUM

*Szanowny Panie*

W związku ze zgłoszeniem do Komisji Bioetycznej Pomorskiego Uniwersytetu Medycznego w Szczecinie opisu badania pt „*Co młodzi dorośli myślą o leczeniu nakładkami? - badanie ankietowe w krajach Europy i Ameryki Łacińskiej*”, sygn. RPW/6546/2022P uprzejmie informuję, iż z przedłożonej dokumentacji wynika, że przedmiotowe badanie nie wymaga opinii Komisji Bioetycznej.

Z poważaniem

PRZEWODNICZĄCY  
Komisji Bioetycznej  
Pomorskiego Uniwersytetu Medycznego  
w Szczecinie  
prof. dr hab. n. med. Marek Drożdżik

Certified translation from Polish

[logo]

Pomeranian Medical University in Szczecin  
(Pomorski Uniwersytet Medyczny w Szczecinie)

BIOETHICS COMMITTEE

KB.006.83.2022/Z-6546

Szczecin, 5<sup>th</sup> September, 2022

**Mr Maciej Jedliński**  
Department of Integrated Dentistry  
Pomeranian Medical University in Szczecin

Dear Sir,

Following the notification of description of the study entitled: *"What do young adults think about aligner treatment? - A survey in European and Latin American countries"*, ref. RPW/6546/2022P, to the Bioethics Committee of Pomeranian Medical University in Szczecin, please kindly be informed that the documentation provided to the Committee shows that the above study does not require opinion of the Bioethics Committee.

Regards,

/-/Impression of a seal, reading: "President of the Bioethics Committee of Pomeranian Medical University in Szczecin, Prof. dr hab. n. med. Marek Drożdżik"

/-/Personal signature

Pomorski Uniwersytet Medyczny w Szczecinie, ul. Rybacka 1, 70-204 Szczecin  
www.pum.edu.pl

Certified to be a true and exact translation of the original document from Polish.

Repertory number: 1424/2023 Szczecin, 14.11.2023

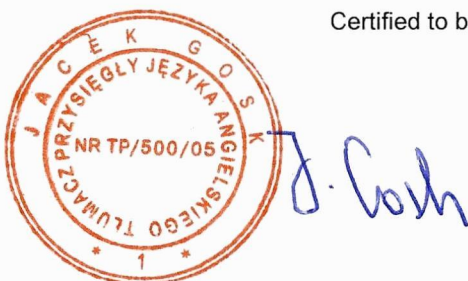

**SWORN TRANSLATOR  
AND  
INTERPRETER OF ENGLISH**

*Jacek Gosk, M.A.*  
70-402 Szczecin, ul. Kaszubska 57  
phone: +(4891) 4336250, mobile: 0605 935934
